# Supplementary material for: A mathematical model of the impact of insulin secretion dynamics on selective hepatic insulin resistance
Source: PubMed Central journal article supplement (PMC5678123; doi:10.1038/s41467-017-01627-9), 2017-11-08
Supplement: 41467_2017_1627_MOESM3_ESM.pdf [file 41467_2017_1627_MOESM3_ESM.pdf]

### **Description of Supplementary Files**

File name: Supplementary Data 1

Description: Multiple parameter values of the minimal model.

File name: Supplementary Software

Description: Matlab codes for generating main figures.
